# Supplementary material for: In Silico Screening of a Bile Acid Micelle Disruption Peptide for Oral Consumptions from Edible Peptide Database
Source: MDPI journal article supplement (doi:10.3390/foods10102496), 2021-10-18
Supplement: s1 [file s1]

# **In Silico Screening of a Bile Acid Micelle Disruption**

## **Peptide for Oral Consumption from Edible Peptide**

### **Database**

Kento Imai <sup>1,2</sup>, Yuri Takeuchi <sup>1</sup>, Kazunori Shimizu <sup>1</sup> and Hiroyuki Honda <sup>1,\*</sup>

<sup>1</sup> *Department of Biomolecular Engineering, Graduate School of Engineering, Nagoya*

*University, Nagoya 464-8603, Japan; kento.keitai.171027@gmail.com (K.I.);*

*takeuchi.yuri@f.mbox.nagoya-u.ac.jp (Y.T.); shimi-zu@chembio.nagoya-u.ac.jp (K.S.)*

<sup>2</sup> *Japan Society for the Promotion of Science, Research Fellowship for Young Scientists,*

*Chiyoda-ku, Tokyo 102-0083, Japan*

\* Correspondence: [honda@chembio.nagoya-u.ac.jp](mailto:honda@chembio.nagoya-u.ac.jp)

The supplementary information contains the following sections:

Figures S1 and S2, Tables S1 and S2

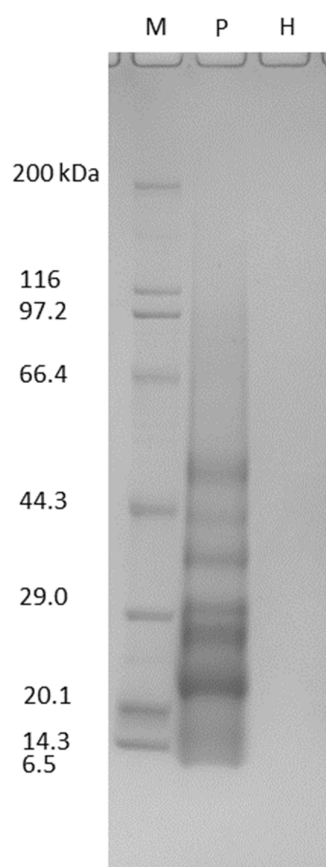

Figure S1

SDS-PAGE analysis of ginkgo protein. Ginkgo protein (lane P) and hydrolysate (lane H) samples were analyzed using a 5–20 % SDS gel. The molecular weights of the protein bands in Protein Molecular Weight Marker Broad (lane M; kDa) are shown to the left of the gel.

(A) VEEFYCS

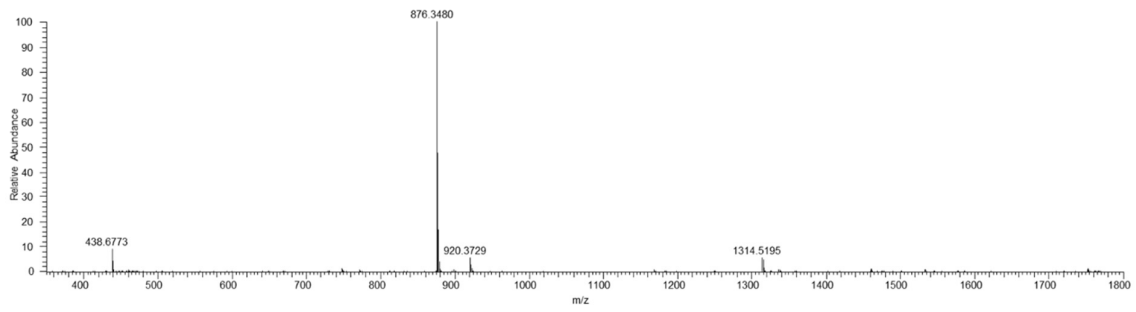

(B) Hydrolysate

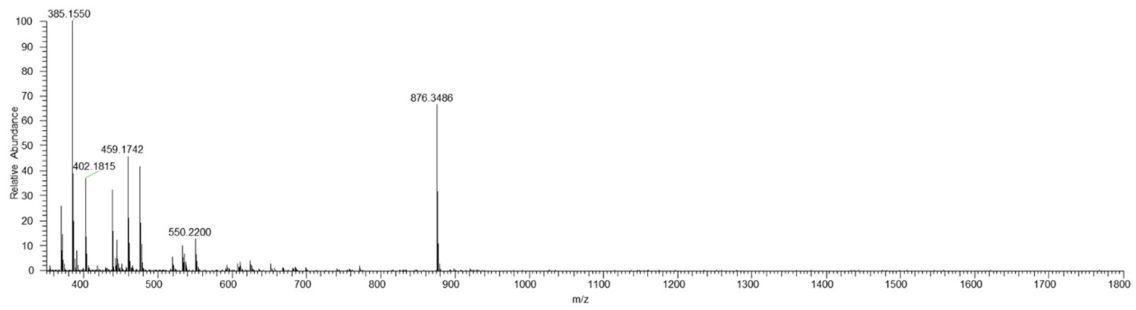

Figure S2

Mass spectra of (A) VEEFYCS and (B) ginkgo protein hydrolysate.

Table S1

The number of peptide libraries and positive and negative peptides

| Residue        | 4     | 5     | 6     | 7      |
|----------------|-------|-------|-------|--------|
| 1 (Positive)   | 19667 | 35158 | 33373 | 50796  |
| Positive ratio | 35%   | 39%   | 34%   | 49%    |
| 0 (Negative)   | 36504 | 54505 | 65014 | 52009  |
| Total          | 56171 | 89663 | 98387 | 102805 |

Table S2 Amino acid (AA) distribution of 150 positives and 150 negatives from RF modeling

| Category     | Total | Positives                | Negatives                 | Odds ratio |
|--------------|-------|--------------------------|---------------------------|------------|
| with R, K    | 251   | 120                      | 60                        | 6.00       |
| w/o R, K     | 209   | 30                       | 90                        |            |
| with D, E    | 234   | 21<br>(with F, Y, W; 19) | 116<br>(with F, Y, W; 58) |            |
| w/o D, E     | 226   | 129                      | 34                        | 21.0       |
| with F, Y, W | 323   | 124                      | 74                        | 4.90       |
| w/o F, Y, W  | 137   | 26                       | 76                        |            |
| Total        | 460   | 150                      | 150                       |            |

Abbreviations; w/o; without, R: Arg, K: Lys, D: Asp, E: Glu, F: Phe, Y: Tyr, W: Trp.
